# Supplementary material for: Knockdown of CDCA8 inhibits the proliferation and enhances the apoptosis of bladder cancer cells
Source: PeerJ. 2020 Apr 28;8:e9078. doi: 10.7717/peerj.9078 (PMC7194097; doi:10.7717/peerj.9078)
Supplement: Supplemental Information 1 [file peerj-08-9078-s001.xlsx]

## Sheet: Sheet1
ID	Type	Dyeing intensity	Positive rate	CDCA8 Score	Grade	Gender	Age	Lymph node invasion	T	N	M
A01	Bladder urothelial carcinoma	strong	1	9	Ⅲ	male	75	No	T3	N0	M0
A02	Bladder urothelial carcinoma	strong	1	9	Ⅱ	male	76	Yes	T2	N1	M0
A03	Bladder urothelial carcinoma	moderate	1	6	Ⅲ	female	66	No	T2	N0	M0
A04	Bladder urothelial carcinoma	strong	1	9	Ⅲ	male	58	No	T1	N0	M0
A05	Bladder urothelial carcinoma	strong	1	9	Ⅲ	male	67	Yes	T2	N1	M0
A06	Bladder urothelial carcinoma	moderate	1	6	Ⅱ	male	77	No	T1	——	M0
B01	Bladder urothelial carcinoma	moderate	1	6	Ⅱ	male	61	No	T1	N0	M0
B02	Bladder urothelial carcinoma	strong	1	9	Ⅲ	female	58	No	T3	N0	M0
B03	Bladder urothelial carcinoma	strong	1	9	Ⅲ	male	51	Yes	T4a	N1	M0
B04	Bladder urothelial carcinoma	moderate	1	6	Ⅲ	male	73	Yes	T1	——	M0
B05	Bladder urothelial carcinoma	strong	1	9	Ⅲ	male	82	No	T3	N0	M0
B06	Bladder urothelial carcinoma	moderate	1	6	Ⅱ	male	68	No	T2	N0	M0
C01	Bladder urothelial carcinoma	strong	1	9	Ⅱ	male	82	No	T2	N0	M0
C02	Bladder urothelial carcinoma	moderate	1	6	Ⅲ	male	62	No	T2	N0	M0
C03	Bladder urothelial carcinoma	moderate	1	6	Ⅲ	male	73	No	T3	——	M0
C04	Bladder urothelial carcinoma	strong	1	9	Ⅲ	male	77	Yes	T3	N1	M0
C05	Bladder urothelial carcinoma	moderate	1	6	Ⅱ	male	80	No	T2	——	M0
C06	Bladder urothelial carcinoma	moderate	1	6	Ⅱ	male	74	No	T1	N0	M0
D01	Bladder urothelial carcinoma	moderate	1	6	Ⅲ	male	50	No	T3	N0	M0
D02	Bladder urothelial carcinoma	moderate	1	6	Ⅱ	male	59	No	T3	N0	M0
D03	Bladder urothelial carcinoma	strong	1	9	Ⅲ	male	79	Yes	T4a	——	M0
D04	Bladder urothelial carcinoma	strong	1	9	Ⅲ	male	76	No	T3	N0	M0
D05	Bladder urothelial carcinoma	moderate	1	6	Ⅱ	male	57	No	T3	N0	M0
D06	Bladder urothelial carcinoma	moderate	1	6	Ⅲ	female	79	Yes	T4	——	M0
E01	Bladder urothelial carcinoma	moderate	1	6	Ⅲ	female	77	Yes	T2	——	M0
E02	Bladder urothelial carcinoma	strong	1	9	Ⅲ	female	85	Yes	T3	——	M0
E03	Bladder urothelial carcinoma	strong	1	9	Ⅲ	male	76	No	T1	N0	M0
E04	Bladder urothelial carcinoma	moderate	1	6	Ⅱ	male	61	No	T1	N0	M0
E05	Bladder urothelial carcinoma	strong	1	9	Ⅲ	male	84	No	T3	N0	M0
E06	Bladder urothelial carcinoma	moderate	1	6	Ⅲ	male	75	Yes	T2	N1	M0
E07	Bladder urothelial carcinoma	moderate	1	6	Ⅱ	male	78	No	T1	——	M0
F01	Bladder urothelial carcinoma	moderate	1	6	Ⅲ	female	77	No	T3	N0	M0
F02	Bladder urothelial carcinoma	moderate	1	6	Ⅱ	male	75	No	T2	N0	M0
F03	Bladder urothelial carcinoma	strong	1	9	Ⅲ	male	71	No	T3	N0	M0
F04	Bladder urothelial carcinoma	moderate	1	6	Ⅲ	male	62	No	T2	N0	M0
F07	Bladder mucosa	moderate	1	6
F09	Bladder mucosa	moderate	1	6
F10	Bladder mucosa	moderate	1	6
G01	Bladder mucosa	weak	0.8	3
G02	Bladder mucosa	weak	0.9	3
G03	Bladder mucosa	moderate	1	6
G04	Bladder mucosa	moderate	1	6
